# Supplementary material for: Signet Ring Cell Carcinoma of the Vater's Ampulla: A Very Rare Malignancy
Source: Hindawi journal article supplement (doi:10.1155/2012/402798), 2012-01-01
Supplement: f1 [file 402798.f1.pdf]

## SUPPLEMENTARY FIGURES:

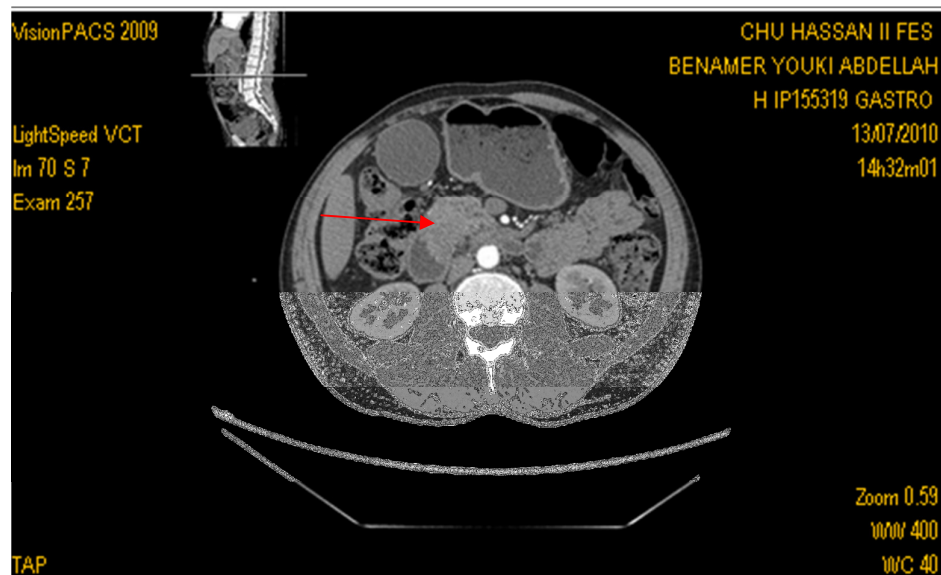

Figure 1: CT scan of the abdomen cut showed a process in the ampulla of Vater

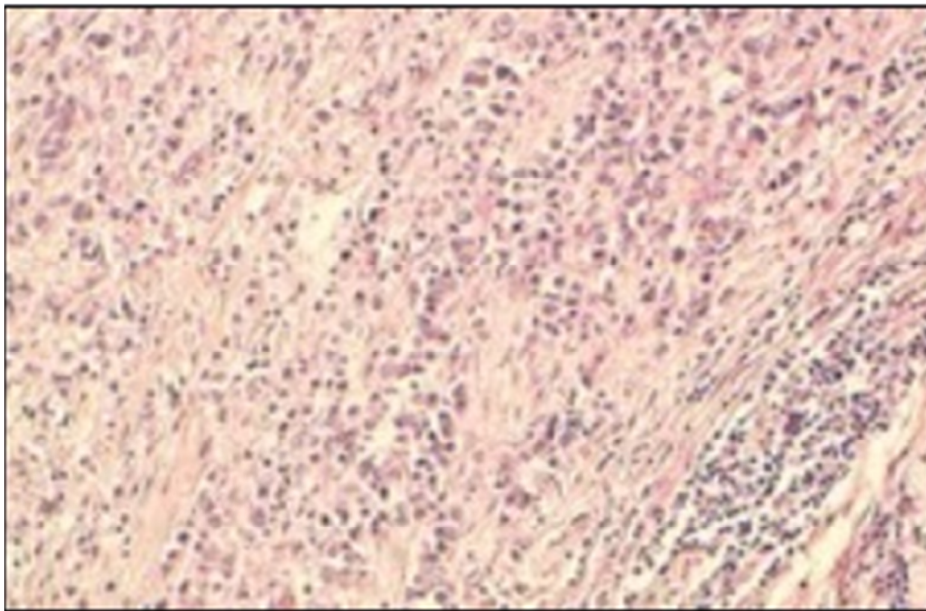

Figure 2: The tumor was solely formed by signet ring cell carcinoma
